# Supplementary material for: Air quality forecasts on a kilometer-scale grid over complex Spanish terrains
Source: Copernicus journal article supplement (doi:10.5194/gmd-7-1979-2014), 2014-09-08
Supplement: Supplementary file 1 [file gmd-7-1979-2014-supplement.pdf]

Supplement of Geosci. Model Dev., 7, 1979–1999, 2014  
<http://www.geosci-model-dev.net/7/1979/2014/>  
doi:10.5194/gmd-7-1979-2014-supplement  
© Author(s) 2014. CC Attribution 3.0 License.

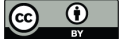

*Supplement of*

## **Air quality forecasts on a kilometer-scale grid over complex Spanish terrains**

**M. T. Pay et al.**

*Correspondence to:* M. T. Pay (maria.pay@bsc.es)

## 1 **Supplementary Material S1: Meteorological evaluation**

2 Comparison with METAR reveals that WRF (both 4 km and 1 km) depicts a high  
3 agreement with observed temperature and wind, with  $r$  between 0.67-0.94 (Table S1).  
4 However, WRF shows a tendency to underestimate mean T2M ( $\sim 0.4^\circ\text{C}$  mean),  
5 especially maximum and minimum ( $1.5^\circ\text{C}$  and  $1.7^\circ\text{C}$ , p25 and p75, respectively); and  
6 overestimate U10 during the night and early morning ( $\sim 1 \text{ ms}^{-1}$ ). Overall, the resolution  
7 increase slightly improves T2M (bias by  $0.1^\circ\text{C}$ ), U10 (bias by  $0.1 \text{ ms}^{-1}$  and  $r$  by 0.1) and  
8 WD10 (error in  $52^\circ$  and  $r$  by 0.1). However, it slightly decreases WD10 bias (by  $2^\circ$ ).

9 Analysis of daily cycles by domain presents different meteorological performance at  
10 different study domains (Fig. S1, Table S1). In the AND domain, WRFv3.5 (at both  
11 resolutions) shows problems to reproduce night wind speed with overestimation  $\sim 1 \text{ ms}^{-1}$ ,  
12 and T2M is systematically underestimated by  $\sim 1^\circ\text{C}$  along the daily cycle. The  
13 resolution increase has a positive effect in T2M and U10. T2M and U10 errors and bias  
14 decrease (by  $0.1^\circ\text{C}$  and  $0.2 \text{ ms}^{-1}$ ). T2M bias improvements are located in the daytime,  
15 but no specific time for U10. Wind direction indicates dominant influence of southerly  
16 winds affecting AND, which transport desert dust from the North Africa as a result of  
17 the influence of the high pressure system.

18 Over the BCN domain, the WRF overestimation at night wind speed is present as well  
19 ( $\sim 1 \text{ ms}^{-1}$ ) at both resolutions. The T2M is slightly underestimated, but the main  
20 deviations are found at daytime with a bias of  $\sim 3^\circ\text{C}$  at both resolutions. The resolution  
21 increase has a negative effect on T2M and U10. Although T2M bias decreases by  $0.1^\circ$ ,  
22 especially at night, T2M errors increase ( $0.2^\circ\text{C}$ ) and  $r$  decreases (from 0.90 to 0.85). For  
23 U10, errors and bias also increase ( $0.1 \text{ ms}^{-1}$  and  $0.2 \text{ ms}^{-1}$ , respectively), especially at  
24 night. The speed direction reveals control of the mesoscale phenomena, sea breeze at  
25 daytime ( $\sim 170$  deg) and land breeze during the night ( $\sim 300$  deg). They show that the  
26 simulated wind directions are more northerly than those measured in the land breeze  
27 period; meanwhile during the sea breeze period the mean simulated wind was more  
28 easterly than the measurements registered.

29 In the MAD domain, the meteorological fields underestimate observed T2M almost  
30 systematically over the daily cycle by  $\sim 2^\circ\text{C}$ , and also underestimate U10  $\sim 2 \text{ ms}^{-1}$  at night  
31 at both resolutions. Simulated wind directions are more southerly than those measured  
32 at night time. Resolution increase has the lowest effect compared to other domains.

1 Error and bias for T2M and U10 do not change, only T2M bias is reduced by 7% when  
 2 resolution increases.

3 Table S1. Statistics for T2M, U10 and WD for April 2013 at METAR stations as a  
 4 function of horizontal resolution (4 km and 1 km). n indicates the number of pairs of  
 5 data used in the discrete evaluation on an hourly basis.

|                            | class | n (stations) | MB<br>( $\mu\text{gm}^{-3}$ ) |       | MGE<br>( $\mu\text{gm}^{-3}$ ) |     | RMSE<br>( $\mu\text{gm}^{-3}$ ) |     | r    |      |
|----------------------------|-------|--------------|-------------------------------|-------|--------------------------------|-----|---------------------------------|-----|------|------|
|                            |       |              | 4km                           | 1km   | 4km                            | 1km | 4km                             | 1km | 4km  | 1km  |
| T2M ( $^{\circ}\text{C}$ ) | All   | 6072 (10)    | -1.25                         | -1.18 | 1.7                            | 1.7 | 2                               | 2   | 0.94 | 0.94 |
|                            | AND   | 3689 (6)     | -1.21                         | -1.14 | 1.7                            | 1.6 | 2                               | 2   | 0.94 | 0.94 |
|                            | BCN   | 1216 (2)     | -1.09                         | -1.04 | 1.5                            | 1.6 | 1.8                             | 2   | 0.90 | 0.85 |
|                            | MAD   | 1167 (2)     | -1.55                         | -1.44 | 1.8                            | 1.8 | 2.2                             | 2.2 | 0.96 | 0.95 |
| U10 (m/s)                  | All   | 5769 (10)    | 0.64                          | 0.58  | 1.5                            | 1.5 | 2.1                             | 2.1 | 0.67 | 0.68 |
|                            | AND   | 3420 (6)     | 0.67                          | 0.53  | 1.5                            | 1.4 | 2                               | 2   | 0.70 | 0.71 |
|                            | BCN   | 1195 (2)     | 0.63                          | 0.8   | 1.8                            | 1.8 | 2.4                             | 2.5 | 0.63 | 0.64 |
|                            | MAD   | 1154 (2)     | 0.58                          | 0.54  | 1.5                            | 1.5 | 1.9                             | 1.9 | 0.65 | 0.66 |
| WD10 (deg)                 | All   | 5029 (10)    | 6.1                           | 8.4   | 53                             | 51  | 89                              | 89  | 0.58 | 0.59 |
|                            | AND   | 2876 (6)     | 14.5                          | 17.7  | 48                             | 47  | 80                              | 79  | 0.61 | 0.62 |
|                            | BCN   | 1094 (2)     | 3.2                           | 2.3   | 61                             | 58  | 98                              | 97  | 0.53 | 0.56 |
|                            | MAD   | 1059 (2)     | -13.7                         | -10.7 | 57                             | 57  | 101                             | 102 | 0.53 | 0.52 |

6

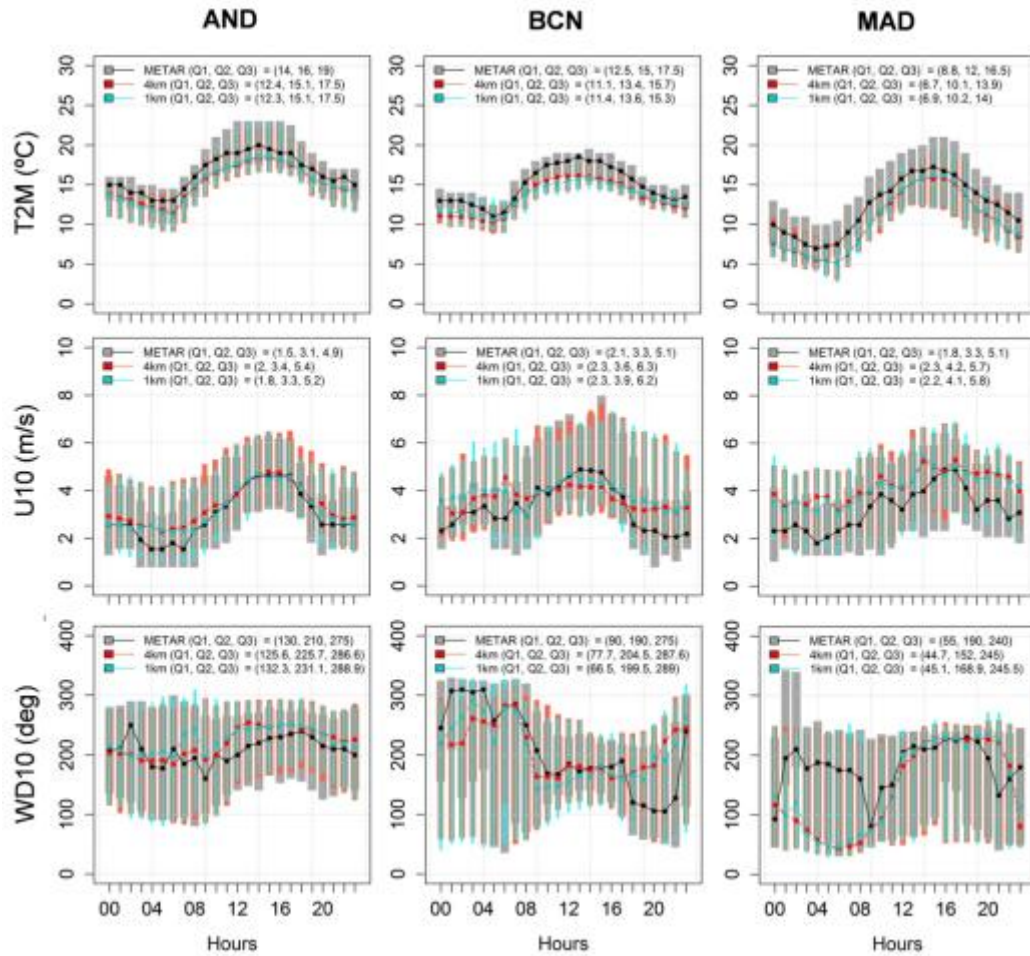

1

2 Figure S1. Daily cycles for T2M, U10 and WD10 for each study domain at METAR  
 3 stations as a function of resolution. Q1, Q2 and Q3 indicate quartiles for the daily cycle.

4 Bars show Q1 and Q3 at each hour.

5
